# Supplementary material
Source: Research Square preprint supplement (doi:10.21203/rs.3.rs-9899999/v1)
Supplement: Supplementary file 1 [file 3624de0dab7ff2b5d89d805b.xlsx]

## Sheet: Read Me
	This supplemental data supports the manuscript submission, "Lessons Learned and Iterative Enhancements: A 2-Year Experience with an Established Responsible AI Framework", for the npj Digital Medicine call for papers collection, "Evaluating the Real-World Clinical Performance of AI". The data, in the "Data" tab, represents requests for new solutions or features with an AI component that were evalu…
	Corresponding Author: Torre Caparatta PhD torre.caparatta@unchealth.unc.edu Information Services Division – Enterprise Analytics and Data Services UNC Health Morrisville, NC 27560 United States

## Sheet: Definitions
Column	Definition	Type
Eval ID	An anonymized identifier for each evaluation	Numeric
Recommendation	The majority verdict on whether an AI-enabled tool was responsibly developed, determined by the technical evaluators after discussion and based upon the vendor response	Categorical: Approval, Conditional Approval, Rejection
Recommendation Version	The established definition set used for the recommendations, established first in 2024 and then revised in 2026	Categorical: (est. 2024), (est. 2026)
Re-evaluation	The number of evaluations performed on a particular AI tool or feature; multiple evaluations could be the result of insufficient initial data or user/system expansion	String
Final Review	Binary value to indicate whether the evaluation was the last (can be used to determine tool-level statistics)	Categorical: TRUE, FALSE
Assigned Datetime	Datetime that an AI-enabled solution request becomes a task (AI solution review) and was assigned to the responsible AI team; this does not reflect when the vendor response was provided or sufficient for evaluation	Datetime
Closed Datetime	Datetime that a given task (AI solution review) was closed by the responsible AI team; this is loosely aligned with when the initial review pathway is completed, e.g., AAA endorsement	Datetime
Elapsed Weeks	Difference in weeks between "Assigned Datetime" and "Closed Datetime"	Numeric
Evaluation Date	Date on which the discussion was held by technical evaluators	Date
Risk Tier	One of three risk-stratified pathways where tier 0 is for low risk tools, tier 1 is for moderate risk tools, and tier 2 is for high risk tools; see the manuscript for detailed descriptions	Categorical: Tier 0, Tier 1, Tier 2
Survey Version	One of three survey versions utilized during the study period; see the manuscript for detailed differences	Categorical: v1, v2, v3
Valid Risk Response	In addressing tool risk (i.e., asked to provide a risk gradient in a survey or otherwise supplied a response regarding associated risk), whether the vendor provided specific tools risks or a variety of non-answers	Categorical: Yes; No: "No Risk"; Asked, not answered; No: Generic response; No: Human-in-the-loop
HITL Utilized as Risk Mitigation	Whether the vendor mentioned human-in-the-loop (HITL) as a part of the process or a mitigation of risk and whether it was the only mitigation method	Categorical: Yes, No, Yes ("No Risk"), Yes (HITL Only)
Monitoring Category	Generalized monitoring categories based upon customer/user involvement as the responses varied widely and included specifics that could identify the vendor and tool	Categorical: Active, Passive, Hybrid, None, Uncertain
Algorithm(s)	Direct quotations or summarizations of vendor responses regarding the AI algorithm(s) utilized	String
Machine Learning Category	Generalized machine learning categories to simplify algorithm trends; see the manuscript for detailed descriptions	Categorical: Unsupervised Learning, Supervised Learning, Deep Learning, Reinforcement Learning, Machine Learning Unspecified
Multifaceted AI	Binary value that indicated whether the response alluded to or explicitly specified multiple AI algorithm types utilized within the solution	Categorical: No, Yes
Tool Area 1	The hospital area for which the tool is intended to be used	Categorical: Accounting, Administrative applications, Anesthesiology, Billing / Coding, Cardiology, Clinical laboratory sciences, Emergency medicine, Finance / Revenue cycle, Finance, Hospital medicine, Hospital operations, Human resources, Information technology, Interventional cardiologists, Medical research, Multiple clinical areas, Ophthalmology, Orthopedic surgery, Outpatient, Pathology, Pat…
Tool Area 2	(Optional) A secondary hospital area for which the tool is intended to be used	Categorical: Accounting, Administrative applications, Anesthesiology, Billing / Coding, Cardiology, Clinical laboratory sciences, Emergency medicine, Finance / Revenue cycle, Finance, Hospital medicine, Hospital operations, Human resources, Information technology, Interventional cardiologists, Medical research, Multiple clinical areas, Ophthalmology, Orthopedic surgery, Outpatient, Pathology, Pat…
Tool: Clinical or Administrative	Generalized tool area category indicating whether "Tool Area 1" and "Tool Area 2" represent a clinical or administrative hospital area	Categorical: Clinical, Admin, Both, Neither
Evaluators (n)	The number of technical evaluators that submitted a review of the vendor survey responses	Integer
Pillar Fairness Score	For fairness questions, represented as a percentage and calculated as the sum of all evaluators’ points relative to the maximum potential evaluator points	Numeric (Range: 0% to 100%)
Pillar Transparency Score	For transparency questions, represented as a percentage and calculated as the sum of all evaluators’ points relative to the maximum potential evaluator points	Numeric (Range: 0% to 100%)
Pillar Accountability Score	For accountability questions, represented as a percentage and calculated as the sum of all evaluators’ points relative to the maximum potential evaluator points	Numeric (Range: 0% to 100%)
Pillar Trustworthiness Score	For trustworthiness questions, represented as a percentage and calculated as the sum of all evaluators’ points relative to the maximum potential evaluator points	Numeric (Range: 0% to 100%)
Development Score (v3 only)	For development questions only present in v3, represented as a percentage and calculated as the sum of all evaluators’ points relative to the maximum potential evaluator points	Numeric (Range: 0% to 100%)
AI Details Score (v3 only)	For "AI details" questions only present in v3, represented as a percentage and calculated as the sum of all evaluators’ points relative to the maximum potential evaluator points	Numeric (Range: 0% to 100%)
Validation Score (v3 only)	For validation questions only present in v3, represented as a percentage and calculated as the sum of all evaluators’ points relative to the maximum potential evaluator points	Numeric (Range: 0% to 100%)
Maintenance Score (v3 only)	For maintenance questions only present in v3, represented as a percentage and calculated as the sum of all evaluators’ points relative to the maximum potential evaluator points	Numeric (Range: 0% to 100%)

## Sheet: Data
Eval ID	Recommendation	Recommendation Version	Re-evaluation	Final Review	Assigned Datetime	Closed Datetime	Elapsed Weeks	Evaluation Date	Risk Tier	Survey Version	Valid risk response	HITL Utilized as Risk Mitigation	Monitoring Category	Algorithm(s)	Machine Learning Category	Multifaceted AI	Tool Area 1	Tool Area 2	Tool: Clinical or Administrative	Evaluators (n)	Pillar Fairness Score	Pillar Transparency Score	Pillar Accountability Score	Pillar Trustworthiness Score	Development Score (v3 only)	AI Details Score (v3 only)	Validation Score (v3 only)	Maintenance Score (v3 only)
1	Rejection	(est. 2024)	First Review (1 of 2; see ID11)	FALSE	2024-08-02 14:29:10	2025-07-28 10:52:52	51.4071	2024-10-10	N/A	v1	N/A	Yes	Active	Deep CNN	Deep Learning	No	Radiology	Pulmonology	Clinical	7	0.518367	0.666667	0.691429	0.609524	N/A	N/A	N/A	N/A
2	N/A	N/A	First Review (1 of 2; see ID05)	FALSE	2024-09-25 10:42:39	2025-01-27 11:28:57	17.7189	2024-10-14	N/A	v2	Yes	Yes	Hybrid	LLM	Deep Learning	No	Radiology	N/A	Clinical	5	0.4	0.582857	0.832	0.624	N/A	N/A	N/A	N/A
3	N/A	N/A	First Review (1 of 2; see ID04)	FALSE	2024-09-09 14:37:35	2025-01-27 12:09:44	19.9853	2024-10-21	N/A	v1	No: "No Risk"	No	N/A	Deep learning, transformers with attention mechanisms	Deep Learning	Yes	Finance	N/A	Administrative	7	0.534694	0.585714	0.76	0.728571	N/A	N/A	N/A	N/A
4	Approval	(est. 2024)	Second Review (2 of 2; see ID03)	TRUE	2024-09-09 14:37:35	2025-01-27 12:09:44	19.9853	2024-12-19	N/A	v1	No: "No Risk"	No	N/A	Deep learning, transformers with attention mechanisms	Deep Learning	Yes	Finance	N/A	Administrative	7	0.628571	0.819048	0.822857	0.785714	N/A	N/A	N/A	N/A
5	Conditional Approval	(est. 2024)	Second Review (2 of 2; see ID02; Expansion)	TRUE	2024-09-25 10:42:39	2025-01-27 11:28:57	17.7189	2025-01-16	N/A	v2	Yes	Yes	Hybrid	LLM	Deep Learning	No	Radiology	N/A	Clinical	5	0.57	0.634286	0.824	0.696	N/A	N/A	N/A	N/A
6	Conditional Approval	(est. 2024)	First Review (1 of 1)	TRUE	2024-11-07 13:55:22	2025-03-28 11:11:46	20.1266	2025-01-24	N/A	v2	Asked, not answered	No	Passive	(Likely) CNN	Deep Learning	No	Ophthalmology	N/A	Clinical	7	0.807143	0.616327	0.645714	0.788571	N/A	N/A	N/A	N/A
7	Approval	(est. 2024)	First Review (1 of 1)	TRUE	2024-10-24 08:22:49	2025-04-01 13:56:44	22.7474	2025-02-05	N/A	v2	Yes	Yes	Uncertain	CNN, random forest	Deep Learning	Yes	Radiology	Emergency medicine	Clinical	5	0.74	0.84	0.768	0.84	N/A	N/A	N/A	N/A
8	Conditional Approval	(est. 2024)	First Review (1 of 2; see ID20)	FALSE	2025-01-14 13:50:11	2025-03-24 11:16:37	9.84191	2025-02-13	N/A	v2	No: "No Risk"	Yes ("No Risk")	N/A	LLM	Deep Learning	No	Finance / Revenue cycle	N/A	Administrative	8	0.30625	0.585714	0.57	0.605	N/A	N/A	N/A	N/A
9	Conditional Approval	(est. 2024)	First Review (1 of 1)	TRUE	2024-10-15 14:49:23	2025-04-29 15:36:50	28.0047	2025-02-24	N/A	v2	Yes	Yes	Active	LLM	Deep Learning	No	Cardiology	Medical research	Both	8	0.325	0.492857	0.68	0.535	N/A	N/A	N/A	N/A
10	Conditional Approval	(est. 2024)	First Review (1 of 1)	TRUE	2024-11-01 08:06:00	2025-04-29 15:36:34	25.6161	2025-03-11	N/A	v2	Yes	Yes	Active	Encoder decoder CNN	Deep Learning	No	Radiology	Orthopedic surgery	Clinical	7	0.735714	0.767347	0.811429	0.777143	N/A	N/A	N/A	N/A
11	Rejection	(est. 2024)	Second Review (2 of 2; see ID01)	TRUE	2024-08-02 14:29:10	2025-07-28 10:52:52	51.4071	2025-03-20	N/A	v1	N/A	Yes	Active	Deep CNN	Deep Learning	No	Radiology	Pulmonology	Clinical	9	0.52381	0.725926	0.728889	0.714815	N/A	N/A	N/A	N/A
12	Approval	(est. 2024)	First Review (1 of 1)	TRUE	2025-02-06 15:15:11	2025-04-08 14:17:15	8.70854	2025-03-27	N/A	v2	Yes	Yes	Hybrid	LLM, knowledge graph, RAG	Deep Learning	No	Outpatient	N/A	Both	7	0.878571	0.779592	0.742857	0.725714	N/A	N/A	N/A	N/A
13	Conditional Approval	(est. 2024)	First Review (1 of 1)	TRUE	2025-02-18 08:12:40	2025-05-22 13:36:25	13.3178	2025-04-03	N/A	v2	Asked, not answered	Yes	Uncertain	Unspecified ML	Machine Learning Unspecified	No	Finance / Revenue cycle	N/A	Administrative	6	0.358333	0.557143	0.62	0.406667	N/A	N/A	N/A	N/A
14	Conditional Approval	(est. 2024)	First Review (1 of 1)	TRUE	2025-03-06 11:35:13	2025-05-07 10:12:11	8.84891	2025-05-01	N/A	v2	Asked, not answered	No	Hybrid	LLMs, NLP, Agentic AI	Deep Learning	Yes	Outpatient	N/A	Administrative	5	0.42	0.64	0.656	0.48	N/A	N/A	N/A	N/A
15	Conditional Approval	(est. 2024)	First Review (1 of 1)	TRUE	2025-01-13 14:13:08	2025-05-22 12:23:22	18.4177	2025-05-08	N/A	v2	Asked, not answered	Yes	Active	NLP, Deep learning	Deep Learning	Yes	Finance / Revenue cycle	N/A	Administrative	6	0.658333	0.804762	0.773333	0.58	N/A	N/A	N/A	N/A
16	Approval	(est. 2024)	First Review (1 of 1)	TRUE	2023-10-25 15:41:04	2025-07-01 11:47:50	87.834	2025-05-15	Tier 2	v2	Asked, not answered	Yes	Active	LLM	Deep Learning	No	Multiple clinical areas	N/A	Clinical	9	0.427778	0.590476	0.742222	0.671111	N/A	N/A	N/A	N/A
17	Approval	(est. 2024)	First Review (1 of 1)	TRUE	2025-04-23 10:31:03	2025-07-28 11:05:51	13.7177	2025-06-05	Tier 2	v2	Asked, not answered	Yes	Hybrid	Knowledge graph, NLP, LLMs	Deep Learning	Yes	Multiple clinical areas	N/A	Clinical	9	0.605556	0.752381	0.728889	0.644444	N/A	N/A	N/A	N/A
18	Conditional Approval	(est. 2024)	First Review (1 of 1)	TRUE	2025-05-06 17:55:21	2026-02-12 10:36:38	40.2422	2025-07-10	Tier 1	v2	Yes	No	Active	NLP, Deep learning	Deep Learning	No	Billing / Coding	N/A	Administrative	7	0.871429	0.616327	0.851429	0.594286	N/A	N/A	N/A	N/A
19	Conditional Approval	(est. 2024)	First Review (1 of 1)	TRUE	2025-03-11 13:38:12	2025-07-30 14:38:43	20.1489	2025-07-17	Tier 2	v3	Yes	Yes	Passive	LLM	Deep Learning	No	Administrative applications	Patients	Administrative	8	0.421429	0.616667	0.598611	0.502273	0.675	0.6625	0.43	0.575
20	Conditional Approval	(est. 2024)	Second Review (2 of 2; see ID08; Expansion)	TRUE	2025-06-18 11:59:03	2025-07-30 14:36:13	6.01559	2025-07-24	Tier 2	v3	No: "No Risk"	Yes ("No Risk")	No Monitoring	LLM, knowledge graph, RAG	Deep Learning	No	Finance / Revenue cycle	Accounting	Administrative	9	0.431746	0.666667	0.569136	0.525253	0.594444	0.692593	0.488889	0.481481
21	Conditional Approval	(est. 2024)	First Review (1 of 1)	TRUE	2025-04-08 15:37:28	2025-08-25 11:56:02	19.8352	2025-07-31	Tier 2	v2	No: "No Risk"	Yes ("No Risk")	Passive	Deep Neural Network	Deep Learning	No	Radiology	N/A	Clinical	6	0.616667	0.533333	0.72	0.793333	N/A	N/A	N/A	N/A
22	Approval	(est. 2024)	First Review (1 of 1)	TRUE	2025-06-18 14:31:39	2025-08-25 12:13:58	9.70063	2025-08-07	Tier 2	v3	Yes	Yes	Hybrid	LLM	Deep Learning	No	Pharmacy	N/A	Clinical	8	0.7	0.777778	0.759722	0.727273	0.76875	0.791667	0.68	0.708333
23	Rejection	(est. 2024)	First Review (1 of 3; see IDs 28, 34)	FALSE	2025-06-22 18:00:35	2025-08-25 10:55:19	9.10067	2025-08-07	Tier 2	v3	No: "No Risk"	Yes ("No Risk")	Uncertain	LLMs, NLP	Deep Learning	Yes	Human resources	N/A	Administrative	7	0.595918	0.644444	0.604762	0.584416	0.614286	0.695238	0.4	0.457143
24	Rejection	(est. 2024)	First Review (1 of 1)	TRUE	2025-06-18 13:28:49	2025-08-25 11:59:38	9.70544	2025-08-14	Tier 2	v2	Asked, not answered	No	Passive	LLM	Deep Learning	No	Administrative applications	N/A	Neither	7	0.421429	0.538776	0.617143	0.508571	N/A	N/A	N/A	N/A
25	Approval	(est. 2024)	First Review (1 of 1)	TRUE	2023-12-05 09:15:33	2025-08-07 16:29:56	87.3288	2025-09-04	Tier 2	v3	Asked, not answered	Yes	Passive	LLM	Deep Learning	No	Hospital medicine	N/A	Clinical	10	0.522857	0.742222	0.685556	0.616364	0.6975	0.766667	0.608	0.626667
26	Approval	(est. 2024)	First Review (1 of 1)	TRUE	2025-08-19 17:02:49	2025-09-22 12:09:17	4.82802	2025-09-11	Tier 2	v3	No: Generic response	Yes	Hybrid	Gradient-boosted regression tree	Supervised Learning	No	Hospital operations	N/A	Administrative	9	0.844444	0.839506	0.864198	0.824242	0.852778	0.855556	0.791111	0.837037
27	Conditional Approval	(est. 2024)	First Review (1 of 1)	TRUE	2025-07-22 13:49:39	2025-09-28 00:57:55	9.63772	2025-09-18	Tier 2	v3	No: "No Risk"	Yes ("No Risk")	Passive	CNNs, unspecified ML	Deep Learning	Yes	Radiology	Cardiology	Clinical	9	0.488889	0.669136	0.630864	0.539394	0.672222	0.67037	0.564444	0.555556
28	Rejection	(est. 2024)	Second Review (2 of 3; see IDs 23, 34)	FALSE	2025-09-11 13:58:33	2025-11-20 13:26:30	9.99682	2025-10-09	Tier 2	v3	No: "No Risk"	Yes ("No Risk")	Active	LLMs, NLP	Deep Learning	Yes	Human resources	N/A	Administrative	6	0.652381	0.744444	0.674074	0.630303	0.658333	0.716667	0.566667	0.566667
29	Rejection	(est. 2024)	First Review (1 of 2; see ID43)	FALSE	2025-07-11 16:02:31	2026-01-26 12:50:37	28.4095	2025-10-16	Tier 2	v3	Yes	Yes	Passive	LLM	Deep Learning	No	Multiple clinical areas	N/A	Both	6	0.2	0.42963	0.374074	0.290909	0.408333	0.572222	0.1	0.477778
30	Conditional Approval	(est. 2024)	First Review (1 of 1)	TRUE	2025-06-04 13:45:20	2025-12-02 10:27:06	25.8375	2025-10-30	Tier 2	v3	Asked, not answered	Yes	Hybrid	LLM	Deep Learning	No	Information technology	N/A	Administrative	8	0.5	0.744444	0.659722	0.593182	0.64375	0.779167	0.56	0.541667
31	Approval	(est. 2024)	Second Review (2 of 2; see Tsoi et al. (2025) Table 2 ID F; Expansion)	TRUE	2025-06-18 11:44:10	2026-01-19 21:26:07	30.772	2025-11-06	Tier 2	v3	N/A	Yes	Hybrid	LLMs, speech recognition, unspecified MLs	Deep Learning	Yes	Multiple clinical areas	N/A	Clinical	5	0.725714	0.822222	0.793333	0.756364	0.795	0.853333	0.728	0.786667
32	Approval	(est. 2024)	First Review (1 of 1)	TRUE	2025-09-11 13:28:27	2026-01-15 12:11:22	17.9924	2025-11-06	Tier 2	v3	No: Generic response	Yes	Hybrid	LLMs, speech recognition, unspecified MLs	Deep Learning	Yes	Multiple clinical areas	N/A	Clinical	5	0.725714	0.822222	0.793333	0.756364	0.795	0.853333	0.728	0.786667
33	Conditional Approval	(est. 2024)	First Review (1 of 1)	TRUE	2025-09-11 13:25:30	2025-12-02 10:29:13	11.6968	2025-11-13	Tier 2	v3	Yes	No	Passive	LLM, Agentic AI	Deep Learning	No	Information technology	N/A	Administrative	8	0.628571	0.741667	0.706944	0.625	0.725	0.7375	0.69	0.658333
34	Conditional Approval	(est. 2024)	Third Review (3 of 3; see IDs 23, 28)	TRUE	2025-11-20 13:26:56	2025-11-24 10:35:55	0.554463	2025-11-20	Tier 2	v3	Asked, not answered	Yes	Active	LLMs, NLP	Deep Learning	Yes	Human resources	N/A	Administrative	5	0.674286	0.746667	0.688889	0.661818	0.585	0.733333	0.584	0.666667
35	Conditional Approval	(est. 2024)	First Review (1 of 1)	TRUE	2025-08-12 10:11:37	2026-01-19 20:28:58	22.9184	2025-12-04	Tier 2	v3	Yes	Yes	Passive	Neural Network	Deep Learning	No	Multiple clinical areas	N/A	Clinical	7	0.595918	0.749206	0.706349	0.615584	0.735714	0.752381	0.628571	0.685714
36	Conditional Approval	(est. 2024)	First Review (1 of 1)	TRUE	2025-07-09 13:59:57	2026-01-26 13:45:07	28.7128	2025-12-18	Tier 2	v3	No: "No Risk"	Yes ("No Risk")	Hybrid	LLM	Deep Learning	No	Finance / Revenue cycle	Billing / Coding	Administrative	8	0.525	0.744444	0.681944	0.609091	0.659375	0.783333	0.57	0.7
37	Conditional Approval	(est. 2024)	First Review (1 of 1)	TRUE	2025-08-14 12:06:47	2026-01-29 13:13:27	24.0066	2025-12-18	Tier 2	v3	No: Human-in-the-loop	Yes (HITL Only)	Hybrid	LLM	Deep Learning	No	Cardiology	Interventional cardiologists	Clinical	7	0.530612	0.8	0.742857	0.607792	0.785714	0.809524	0.52	0.742857
38	Approval	(est. 2024)	First Review (1 of 1)	TRUE	2025-07-07 14:13:10	2025-08-11 12:53:11	4.99207	2026-01-08	Tier 2	v3	Yes	Yes	Hybrid	Computational Linguistics Engine	Reinforcement Learning	No	Outpatient	N/A	Clinical	9	0.650794	0.787654	0.733333	0.668687	0.730556	0.737037	0.742222	0.807407
39	Approval	(est. 2024)	First Review (1 of 1)	TRUE	2025-07-07 14:13:10	2025-08-11 12:53:11	4.99207	2026-01-08	Tier 2	v3	Yes	Yes	Hybrid	LLM	Deep Learning	No	Outpatient	N/A	Clinical	9	0.701587	0.792593	0.750617	0.715152	0.763889	0.807407	0.666667	0.718519
40	Approval	(est. 2024)	First Review (1 of 1)	TRUE	2025-07-07 14:13:10	2025-08-11 12:53:11	4.99207	2026-01-08	Tier 2	v3	Yes	Yes	Active	Deep CNN, LLMs, Agentic AI, unspecified MLs	Deep Learning	Yes	Outpatient	N/A	Clinical	9	0.711111	0.814815	0.803704	0.731313	0.761111	0.825926	0.711111	0.814815
41	Approval	(est. 2024)	First Review (1 of 1)	TRUE	2025-06-26 09:23:39	2026-01-26 12:57:21	30.5926	2026-01-15	Tier 2	v3	Yes	No	Hybrid	LLM, Agentic AI	Deep Learning	No	Finance / Revenue cycle	N/A	Administrative	7	0.612245	0.774603	0.730159	0.644156	0.710714	0.780952	0.6	0.714286
42	Approval	(est. 2024)	First Review (1 of 1)	TRUE	2025-11-20 13:45:55	2026-02-12 11:40:46	11.9876	2026-01-15	Tier 2	v3	Yes	No	Hybrid	LLM, Agentic AI	Deep Learning	No	Outpatient	Patients	Administrative	7	0.612245	0.790476	0.719048	0.649351	0.725	0.780952	0.622857	0.638095
43	Approval	(est. 2024)	Second Review (2 of 2; see ID29)	TRUE	2025-07-11 16:02:31	2026-01-26 12:50:37	28.4095	2026-01-22	Tier 2	v3	Yes	Yes	Hybrid	LLM	Deep Learning	No	Multiple clinical areas	N/A	Both	11	0.662338	0.810101	0.759596	0.689256	0.806818	0.824242	0.650909	0.709091
44	Rejection	(est. 2024)	First Review (1 of 2; see ID55)	FALSE	2026-03-10 12:52:54	2026-03-10 13:02:58	0.000998677	2026-01-22	Tier 2	v3	No: Human-in-the-loop	Yes (HITL Only)	Active	"3D computer vision"	Reinforcement Learning	Yes	Radiology	Cardiology	Clinical	8	0.321429	0.636111	0.618056	0.5	0.596875	0.75	0.46	0.491667
45	Conditional Approval	(est. 2026)	First Review (1 of 1)	TRUE	2025-12-04 14:13:26	2026-03-17 16:00:51	14.7249	2026-01-29	Tier 2	v3	Asked, not answered	Yes	Passive	Deep CNN	Deep Learning	No	Hospital medicine	N/A	Clinical	6	0.809524	0.777778	0.775926	0.736364	0.791667	0.772222	0.66	0.7
46	Rejection	(est. 2026)	First Review (1 of 2; see ID56)	FALSE	N/A	N/A	N/A	2026-01-29	Tier 2	v3	No: "No Risk"	Yes ("No Risk")	Hybrid	Stated "20 trained models" in first response. Then specified CNNs in second response.	Deep Learning	Yes	Clinical laboratory sciences	Pathology	Clinical	6	0.547619	0.692593	0.598148	0.590909	0.575	0.688889	0.586667	0.666667
47	Approval	(est. 2024)	First Review (1 of 1)	TRUE	2025-02-12 15:40:27	2026-02-23 11:10:52	53.6875	2026-02-05	Tier 2	v3	Yes	Yes	Passive	LLM	Deep Learning	No	Multiple clinical areas	N/A	Clinical	8	0.653571	0.794444	0.741667	0.665909	0.740625	0.804167	0.67	0.766667
48	Conditional Approval	(est. 2026)	First Review (1 of 1)	TRUE	2026-01-08 12:49:26	2026-02-23 11:07:18	6.5613	2026-02-05	Tier 2	v3	Yes	Yes	Passive	LLM	Deep Learning	No	Anesthesiology	N/A	Clinical	7	0.677551	0.771429	0.753968	0.690909	0.775	0.780952	0.668571	0.742857
49	Conditional Approval	(est. 2026)	First Review (1 of 1)	TRUE	2023-10-13 09:16:28	2026-02-19 15:06:02	122.892	2026-02-12	Tier 2	v3	Yes	Yes	Passive	LLM	Deep Learning	No	Multiple clinical areas	N/A	Clinical	6	0.628571	0.796296	0.727778	0.630303	0.745833	0.794444	0.646667	0.7
50	Approval	(est. 2026)	First Review (1 of 1)	TRUE	2025-03-24 14:27:14	2026-02-26 13:01:56	48.4201	2026-02-12	Tier 2	v3	Yes	Yes	Passive	LLM	Deep Learning	No	Finance / Revenue cycle	Accounting	Administrative	5	0.582857	0.831111	0.751111	0.64	0.775	0.833333	0.616	0.72
51	Approval	(est. 2026)	First Review (1 of 1)	TRUE	2026-01-14 05:16:29	2026-02-23 11:13:23	5.74969	2026-02-12	Tier 2	v3	Yes	Yes	Passive	LLM	Deep Learning	No	Finance / Revenue cycle	Accounting	Administrative	5	0.582857	0.831111	0.751111	0.64	0.775	0.833333	0.616	0.72
52	Approval	(est. 2026)	First Review (1 of 1)	TRUE	2026-01-15 12:33:08	2026-03-18 14:14:19	8.86718	2026-03-05	Tier 2	N/A	N/A	No	Hybrid	LLM, Agentic AI	Deep Learning	No	Human resources	N/A	Administrative	N/A	N/A	N/A	N/A	N/A	N/A	N/A	N/A	N/A
53	Approval	(est. 2026)	First Review (1 of 1)	TRUE	2026-02-04 09:49:58	2026-03-04 11:36:07	4.01053	2026-03-05	Tier 2	N/A	N/A	No	Hybrid	LLM, Agentic AI	Deep Learning	No	Information technology	N/A	Administrative	N/A	N/A	N/A	N/A	N/A	N/A	N/A	N/A	N/A
54	Approval	(est. 2026)	Second Review (2 of 2; see ID44)	TRUE	2025-10-09 12:29:34	2026-03-26 15:13:31	24.0163	2026-03-12	Tier 2	v3	No: Human-in-the-loop	Yes (HITL Only)	Active	"3D computer vision"	Reinforcement Learning	Yes	Radiology	Cardiology	Clinical	10	0.728571	0.795556	0.77	0.765455	0.7925	0.806667	0.772	0.766667
55	Approval	(est. 2026)	First Review (1 of 1)	TRUE	2026-01-08 13:42:33	2026-03-26 15:11:51	11.0089	2026-03-12	Tier 2	v3	N/A	N/A	Active	"3D computer vision"	Reinforcement Learning	Yes	Radiology	Cardiology	Clinical	10	0.728571	0.795556	0.77	0.765455	0.7925	0.806667	0.772	0.766667
56	Approval	(est. 2026)	Second Review (2 of 2; see ID46)	TRUE	N/A	N/A	N/A	2026-03-19	Tier 2	v3	Yes	Yes	Hybrid	CNNs	Deep Learning	No	Clinical laboratory sciences	Pathology	Clinical	8	0.671429	0.727778	0.702778	0.702273	0.678125	0.754167	0.7	0.675
57	Approval	(est. 2024)	First Review (1 of 1)	TRUE	2025-02-07 15:53:21	2025-03-11 14:20:48	4.56225	N/A	Tier 0	N/A	N/A	N/A	N/A	Not collected	Machine Learning Unspecified	N/A	Administrative applications	N/A	Administrative	N/A	N/A	N/A	N/A	N/A	N/A	N/A	N/A	N/A
58	Approval	(est. 2024)	First Review (1 of 1)	TRUE	2025-05-12 13:51:22	2025-05-30 10:43:24	2.55278	N/A	Tier 0	N/A	N/A	N/A	N/A	Not collected	Machine Learning Unspecified	N/A	Finance / Revenue cycle	Administrative applications	Administrative	N/A	N/A	N/A	N/A	N/A	N/A	N/A	N/A	N/A
59	Approval	(est. 2024)	First Review (1 of 1)	TRUE	2025-06-04 13:06:32	2025-06-06 13:51:41	0.290193	N/A	Tier 0	N/A	N/A	N/A	N/A	Not collected	Machine Learning Unspecified	N/A	Multiple clinical areas	N/A	Both	N/A	N/A	N/A	N/A	N/A	N/A	N/A	N/A	N/A
60	Approval	(est. 2024)	First Review (1 of 1)	TRUE	2025-06-10 12:38:40	2025-08-13 13:29:59	9.14795	N/A	Tier 0	N/A	N/A	N/A	N/A	Not collected	Machine Learning Unspecified	N/A	Physical medicine and rehabilitation	N/A	Clinical	N/A	N/A	N/A	N/A	N/A	N/A	N/A	N/A	N/A
61	Approval	(est. 2024)	First Review (1 of 1)	TRUE	2025-06-10 14:30:42	2025-08-13 13:30:40	9.1369	N/A	Tier 0	N/A	N/A	N/A	N/A	Not collected	Machine Learning Unspecified	N/A	Surgery	N/A	Neither	N/A	N/A	N/A	N/A	N/A	N/A	N/A	N/A	N/A
62	Approval	(est. 2024)	First Review (1 of 1)	TRUE	2025-07-17 13:39:24	2025-09-27 19:45:22	10.322	N/A	Tier 0	N/A	N/A	N/A	N/A	LLM	Deep Learning	No	Administrative applications	N/A	Administrative	N/A	N/A	N/A	N/A	N/A	N/A	N/A	N/A	N/A
63	Approval	(est. 2024)	First Review (1 of 1)	TRUE	2025-09-11 13:34:25	2025-12-12 13:25:09	13.1419	N/A	Tier 0	N/A	N/A	N/A	Hybrid	Gradient-boosted regression tree	Supervised Learning	No	Hospital operations	N/A	Administrative	N/A	N/A	N/A	N/A	N/A	N/A	N/A	N/A	N/A
64	Approval	(est. 2024)	First Review (1 of 1)	TRUE	2025-11-06 13:22:24	2026-01-19 22:34:45	10.6262	N/A	Tier 0	N/A	N/A	N/A	N/A	Computer vision models: Object tracking and image classification	Supervised Learning	Yes	Pharmacy	N/A	Neither	N/A	N/A	N/A	N/A	N/A	N/A	N/A	N/A	N/A
